# Supplementary material for: Exploring moisture adsorption on cobalt-doped ZnFe 2 O 4 for applications in atmospheric water harvesting
Source: Royal Society of Chemistry journal article supplement (doi:10.1039/d3ra08152d), 2024-01-01
Supplement: d3ra08152d1.pdf [file d3ra08152d1.pdf]

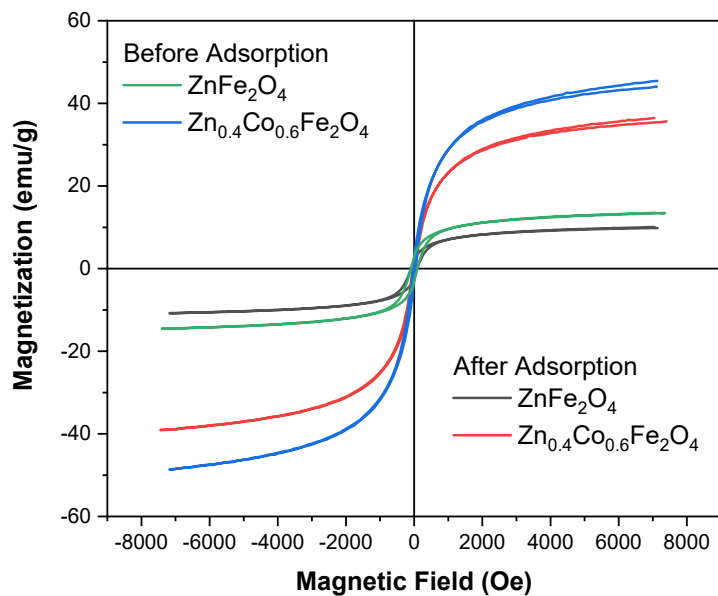

**Supplementary figure 1:** Magnetization hysteresis loop of ZnFe<sub>2</sub>O<sub>4</sub> and Zn<sub>1-x</sub>Co<sub>x</sub>Fe<sub>2</sub>O<sub>4</sub> (x=0.6) before and after adsorption

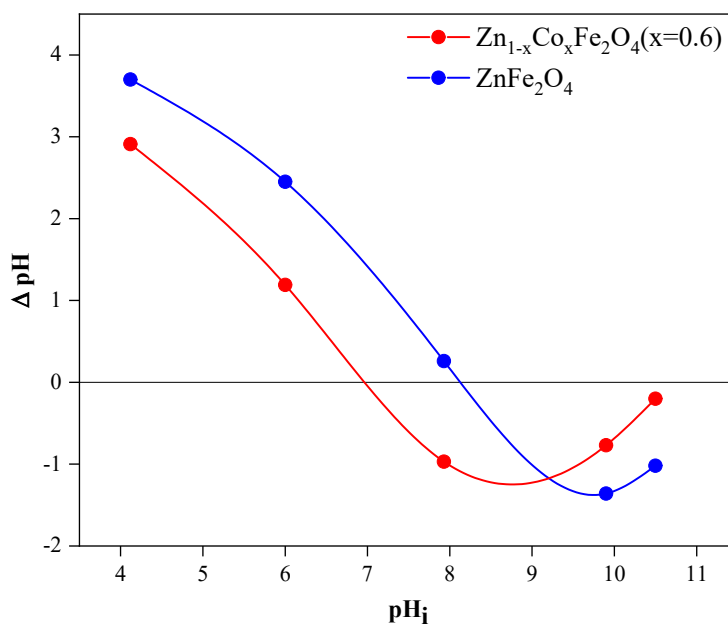

**Supplementary figure 2:** Change in pH versus initial pH for ZnFe<sub>2</sub>O<sub>4</sub> and Zn<sub>1-x</sub>Co<sub>x</sub>Fe<sub>2</sub>O<sub>4</sub> (x=0.6)

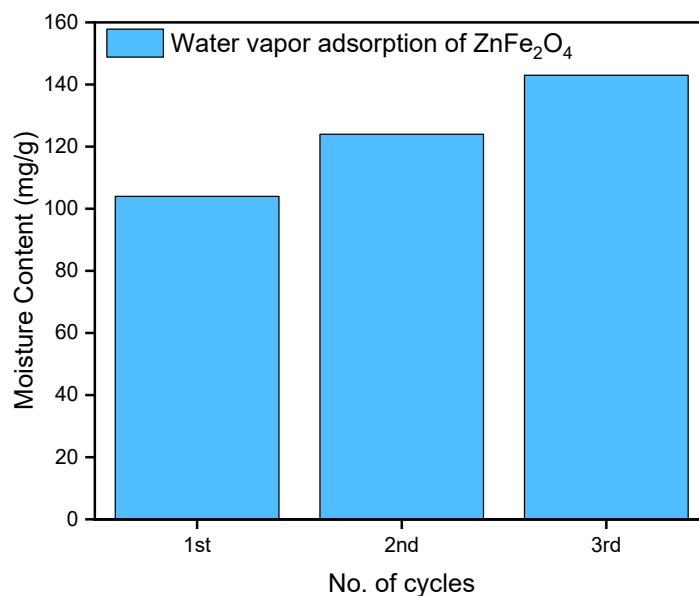

**Supplementary figure 3:** Regeneration studies of ZnFe<sub>2</sub>O<sub>4</sub> at various cycles

**Table S1:** Magnetic parameters for ZnFe<sub>2</sub>O<sub>4</sub> (Before and after adsorption) and Zn<sub>0.4</sub>Co<sub>0.6</sub>Fe<sub>2</sub>O<sub>4</sub> (Before and after adsorption)

| Sample                                                                                           | Saturation magnetization<br>M <sub>s</sub> (emu/g) | Retentivity<br>M <sub>r</sub> (emu/g) | Coercivity<br>H <sub>c</sub> (Oe) | Squareness ratio<br>R= M <sub>r</sub> /M <sub>s</sub> | Magneton number<br>n <sub>B</sub> (μ <sub>B</sub> ) |
|--------------------------------------------------------------------------------------------------|----------------------------------------------------|---------------------------------------|-----------------------------------|-------------------------------------------------------|-----------------------------------------------------|
| <b>ZnFe<sub>2</sub>O<sub>4</sub></b><br><b>(Before adsorption)</b>                               | 13.50113                                           | 2.73646                               | 94.71329                          | 0.20268                                               | 0.58277                                             |
| <b>ZnFe<sub>2</sub>O<sub>4</sub></b><br><b>(After adsorption)</b>                                | 13.59021                                           | 2.75441                               | 93.38768                          | 0.20268                                               | 0.586615                                            |
| <b>Zn<sub>0.4</sub>Co<sub>0.6</sub>Fe<sub>2</sub>O<sub>4</sub></b><br><b>(Before adsorption)</b> | 45.54298                                           | 2.55538                               | 35.54602                          | 0.05611                                               | 1.9343                                              |
| <b>Zn<sub>0.4</sub>Co<sub>0.6</sub>Fe<sub>2</sub>O<sub>4</sub></b><br><b>(After adsorption)</b>  | 36.42958                                           | 2.09884                               | 36.30427                          | 0.05761                                               | 1.547236                                            |

**ZnFe<sub>2</sub>O<sub>4</sub>:**

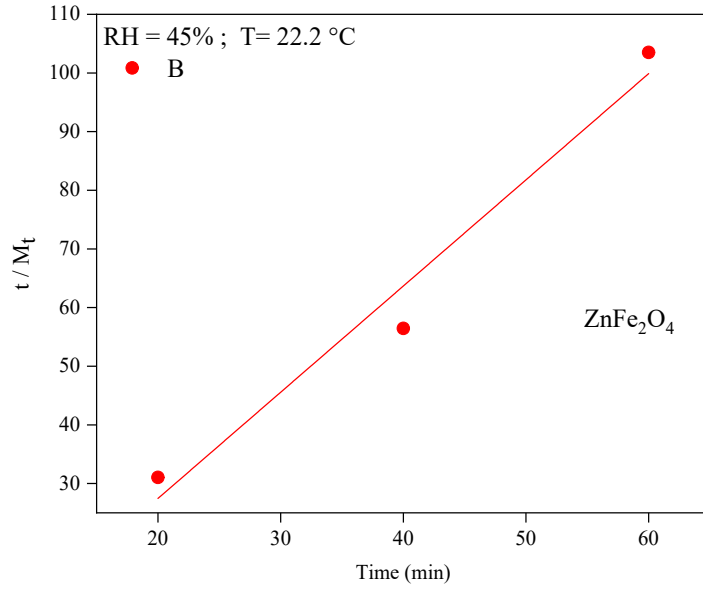

**Fig: 4.38** Pseudo 2<sup>nd</sup> order kinetics model for synthesized ZnFe<sub>2</sub>O<sub>4</sub> at a RH of 45 %

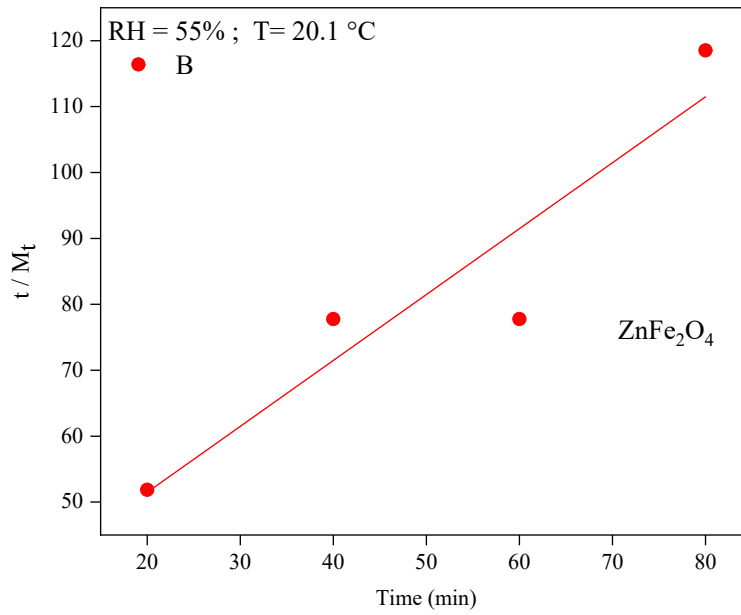

**Fig: 4.39** Pseudo 2<sup>nd</sup> order kinetics model for synthesized ZnFe<sub>2</sub>O<sub>4</sub> at a RH of 55 %

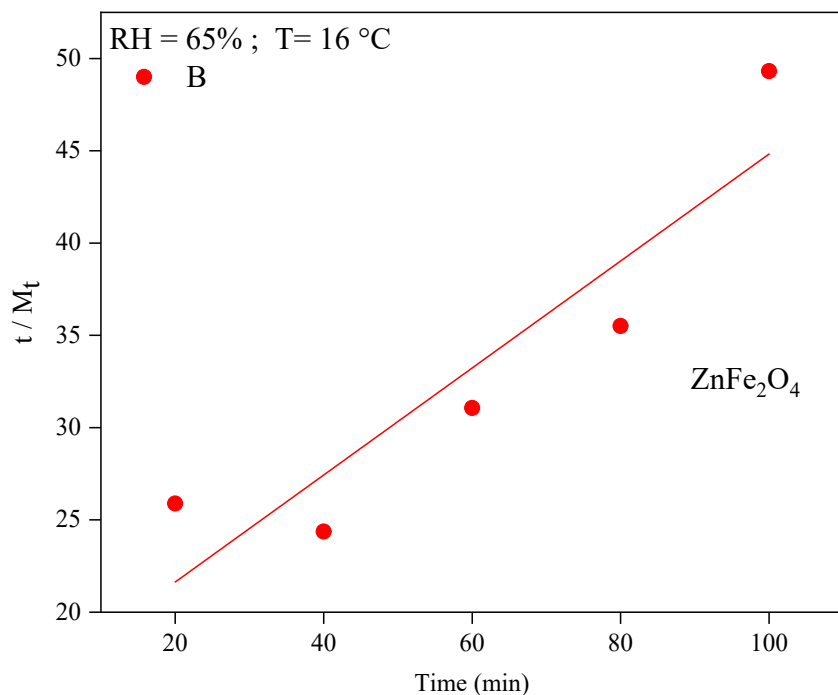

Fig: 4.40 Pseudo 2nd order kinetics model for synthesized ZnFe<sub>2</sub>O<sub>4</sub> at a RH of 65 %

Parameters for Pseudo 2<sup>nd</sup> order kinetics model of synthesized Zn<sub>1-x</sub>Co<sub>x</sub>Fe<sub>2</sub>O<sub>4</sub> (x=0.6) at different RH %

| Sr No | Humidity  | Slope (m) | Intercept (c) | Me (Th) | Me (Exp) (mg/g) | k <sub>2</sub> (min <sup>-1</sup> ) |
|-------|-----------|-----------|---------------|---------|-----------------|-------------------------------------|
| 1.    | 45 % ± 3% | 1.8113    | -8.7818       | 0.5521  | 0.7085          | -0.3736                             |
| 2.    | 55 % ± 3% | 0.9999    | 31.4804       | 1.009   | 0.7714          | 0.0318                              |
| 3.    | 65 % ± 3% | 0.2899    | 15.8338       | 3.4495  | 2.2530          | 0.0053                              |
| 4.    | 75 % ± 3% | 0.2173    | 14.3300       | 4.6019  | 3.2031          | 0.0033                              |
| 5.    | 85 % ± 3% | 0.0818    | 6.6828        | 12.2249 | 7.8305          | 0.0010                              |

|    |           |        |        |         |         |        |
|----|-----------|--------|--------|---------|---------|--------|
|    |           |        |        |         |         |        |
| 6. | 95 % ± 3% | 0.0433 | 6.1666 | 23.0947 | 10.4550 | 0.0003 |

**Zn<sub>1-x</sub>Co<sub>x</sub>Fe<sub>2</sub>O<sub>4</sub> (x=0.6):**

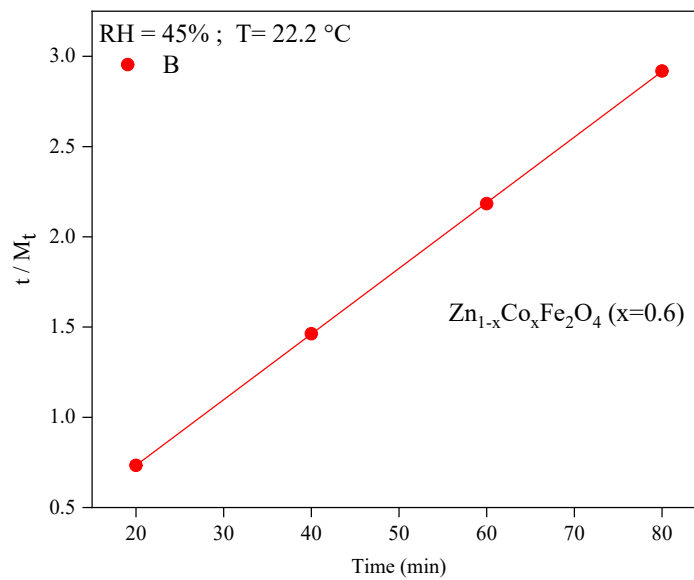

**Fig:4.56** Pseudo 2<sup>nd</sup> order kinetics model for synthesized Zn<sub>1-x</sub>Co<sub>x</sub>Fe<sub>2</sub>O<sub>4</sub> (x=0.6) at a RH of 45 %

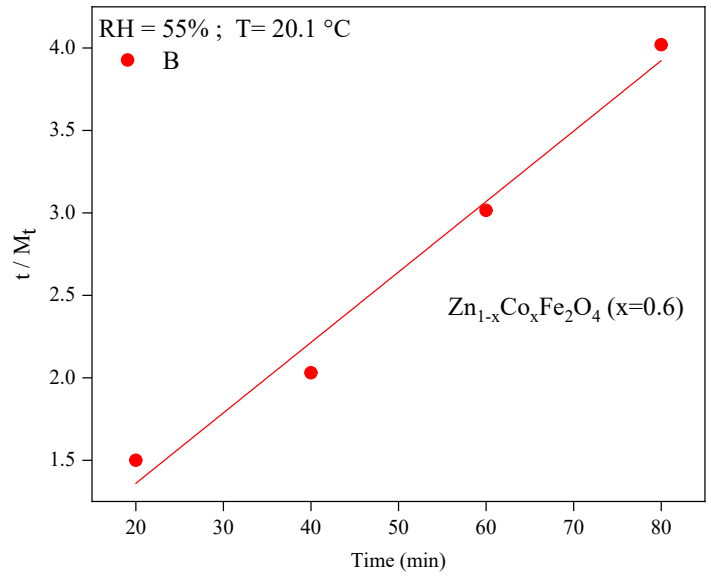

**Fig:4.57** Pseudo 2<sup>nd</sup> order kinetics model for synthesized  $Zn_{1-x}Co_xFe_2O_4$  ( $x=0.6$ ) at a RH of 55 %

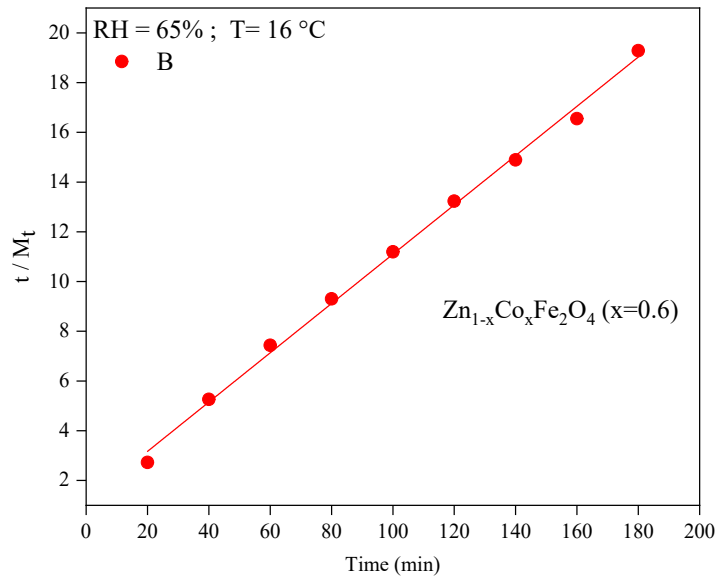

**Fig:4.58** Pseudo 2<sup>nd</sup> order kinetics model for synthesized  $Zn_{1-x}Co_xFe_2O_4$  ( $x=0.6$ ) at a RH of 65 %

Parameters for Pseudo 2<sup>nd</sup> order kinetics model of synthesized Zn<sub>1-x</sub>Co<sub>x</sub>Fe<sub>2</sub>O<sub>4</sub> (x=0.6) at different RH %

| Sr No | Humidity   | Slope (m) | Intercept (c) | Me (Th) | Me(exp) (mg/g) | k <sub>2</sub> (min <sup>-1</sup> ) |
|-------|------------|-----------|---------------|---------|----------------|-------------------------------------|
| 1.    | 45 % ± 3 % | 0.0364    | 0.0058        | 27.4725 | 27.4736        | 0.2285                              |
| 2.    | 55 % ± 3 % | 0.0427    | 0.5052        | 23.4192 | 19.9001        | 0.0036                              |
| 3.    | 65 % ± 3 % | 0.0991    | 1.1871        | 10.0910 | 9.6667         | 0.0083                              |
| 4.    | 75 % ± 3 % | 0.0410    | 2.1683        | 24.3902 | 20.6667        | 0.0008                              |
| 5.    | 85 % ± 3 % | 0.0388    | 0.5677        | 25.7732 | 26.8667        | 0.0030                              |
| 6.    | 95 % ± 3 % | 0.0104    | 1.0446        | 96.1538 | 59.6667        | 0.0001                              |
